# Supplementary material for: Structural characterization of human Vaccinia-Related Kinases (VRK) bound to small-molecule inhibitors identifies different P-loop conformations
Source: PubMed Central journal article supplement (PMC5548783; doi:10.1038/s41598-017-07755-y), 2017-08-08
Supplement: 41598_2017_7755_MOESM1_ESM.pdf [file 41598_2017_7755_MOESM1_ESM.pdf]

# **Structural characterization of human Vaccinia-Related Kinases (VRK) bound to small-molecule inhibitors identifies different P-loop conformations**

Rafael M. Couñago<sup>1,2\*</sup>, Charles K. Allerston<sup>3</sup>, Pavel Savitsky<sup>3</sup>, Hatylas Azevedo<sup>4</sup>, Paulo H Godoi<sup>1,5</sup>, Carrow I. Wells<sup>6</sup>, Alessandra Mascarello<sup>4</sup>, Fernando H. de Souza Gama<sup>4</sup>, Katlin B. Massirer<sup>1,2</sup>, William J. Zuercher<sup>6</sup>, Cristiano R.W. Guimarães<sup>4</sup> and Opher Gileadi<sup>1,3</sup>

1. Structural Genomics Consortium, Universidade Estadual de Campinas — UNICAMP, Campinas, SP, Brazil.
  2. Centro de Biologia Molecular e Engenhariaia Genética, Universidade Estadual de Campinas, Campinas, SP, Brazil.
  3. Structural Genomics Consortium and Target Discovery Institute, Nuffield Department of Clinical Medicine, University of Oxford, UK.
  4. Aché Laboratórios Farmacêuticos SA, Guarulhos, SP, Brazil.
  5. Department of Biochemistry and Tissue Biology, Institute of Biology, State University of Campinas, Campinas, Brazil.
  6. Structural Genomics Consortium, UNC Eshelman School of Pharmacy, University of North Carolina at Chapel Hill, NC, USA.
- \*Correspondence to Rafael M. Couñago: [rafael.counago@unicamp.br](mailto:rafael.counago@unicamp.br) (RMC)

## **Supplementary information**

## SUPPLEMENTARY METHODS

### PKIS results analyses - hierarchical cluster analysis (HCL)

A hierarchical clustering (HCL) analysis was performed to group kinases based on their inhibition patterns across the compounds. The average distance clustering method was employed, using sample tree selection and sample leaf order optimization. The distance metric used was the Pearson correlation and the HCL analysis was performed in the TmeV software <sup>1</sup>.

## SUPPLEMENTARY REFERENCES

- 1 Saeed, A. I. *et al.* TM4: a free, open-source system for microarray data management and analysis. *BioTechniques* **34**, 374-378, (2003).

## SUPPLEMENTARY FIGURES LEGENDS

### Supplementary Figure S1: Hierarchical clustering analysis of PKIS data.

Hierarchical clustering analysis of PKIS data. VRK1 clusters with other kinases such as TNIK and CDK2, indicated with stars. Kinases were clustered according to their thermal shift values obtained in the DSF experiments. The distance metric used was the Pearson correlation. Each leaf in the tree represents one kinase and the VRK1 cluster is highlighted with pink leaves. The blue color in each lane corresponds to the thermal shift values.

### Supplementary Figure S2: Assembly of hydrophobic spines in active VRKs.

Organization of conserved hydrophobic residues (shown as spheres) in the so-called spine of (a) VRK1<sub>3-364</sub>/ASC24 (chain A, green cartoon) and (b) VRK214-335/BI-D1870 (pink cartoon). For VRK1<sub>3-364</sub>/ASC24, location of the surface reduction mutation (SER) clusters 1 to 3 are shown as spheres (C $\alpha$ s), the fourth SER cluster locates to the disordered C-terminal region and was not included in the final model.

### Supplementary Figure S3: Details of the P-loop region in VRK1<sub>3-364</sub>-GW297361X co-crystals and apo-VRK1 NMR ensemble in solution.

All 20 members of the NMR ensemble were superposed to the C-terminal domain (residues 141-341) of VRK1<sub>3-364</sub> bound to GW297361X. NMR structures are shown as grey ribbons, except for the C-terminal regulatory domain, in blue, and the P-loop region, in pink. The co-crystal structure of VRK1<sub>3-364</sub> / GW297361X is shown as a cartoon model in green, except for the P-loop region, in red. Residue Phe48 from the P-loop and ligand GW297361X are shown in stick representation. The C $\alpha$  atoms for residue Phe48 in the co-crystal structure and in the two of the NMR models are shown as spheres. C $\alpha$  atoms for residues within the DYG motif are shown as spheres.

### Supplementary Figure S4: Crystal contacts in the P-loop region of VRK1 and VRK2.

(a) No other atom is within a 4.5 Å radius of the folded P-loop (chain A) in VRK1<sub>3-364</sub>/GW297361X crystals. Chain A is shown as a green cartoon, the other

VRK1 molecules in the crystal asymmetric unit (chains B-D) are shown as green ribbons.  $C\alpha$  trace for symmetry-related molecules are shown as white ribbons. The ligand is shown in stick representation. **(b)** VRK2<sub>14-335</sub>/BI-D1870 crystals have a single protein-ligand complex in the asymmetric unit (pink cartoon). The only identified atoms within a 4.5 Å radius of the folded P-loop region in VRK2 are those from the side chain of Pro319 from a symmetry-related molecule (indicated by a prime) to P-loop residue Ser37.

# SUPPLEMENTARY FIGURES

Supplementary Figure S1

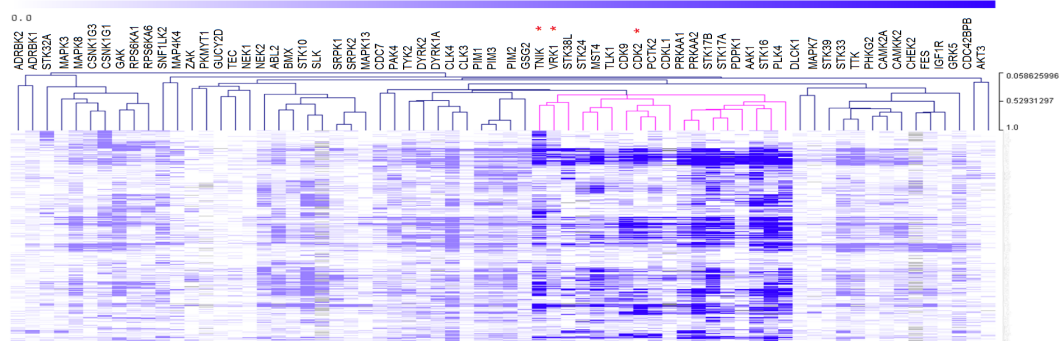

Supplementary Figure S2

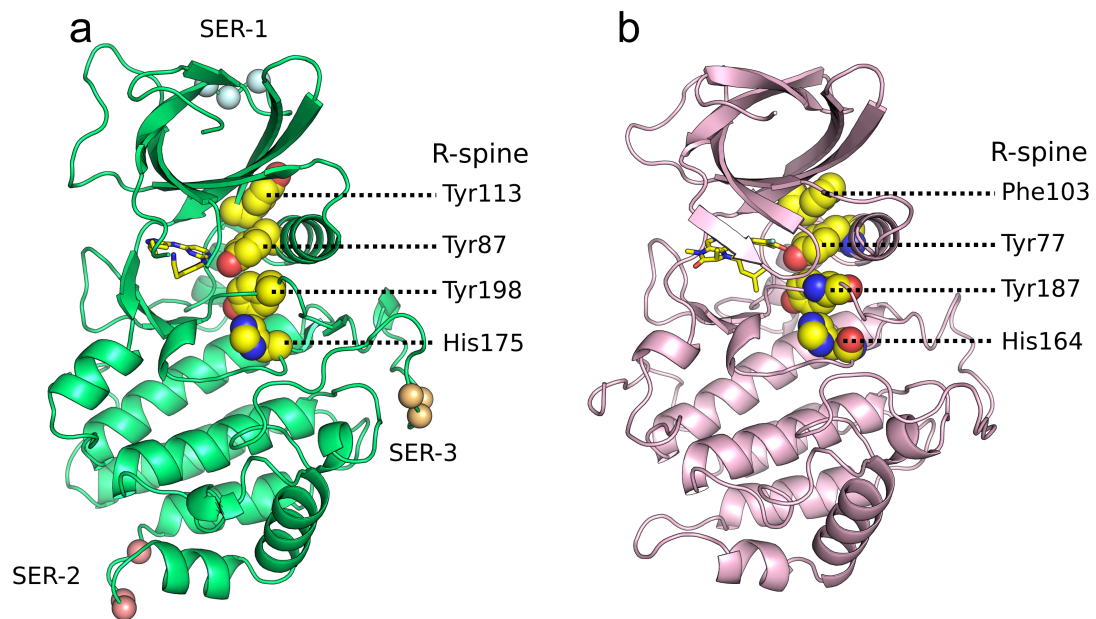

### Supplementary Figure S3

VRK1<sub>3-364</sub> / GW297361  
apo-VRK1 solution structure

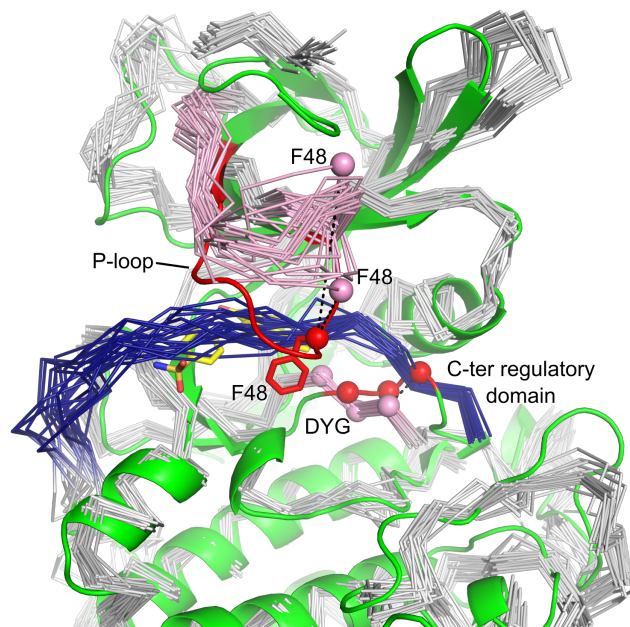

Supplementary Figure S4

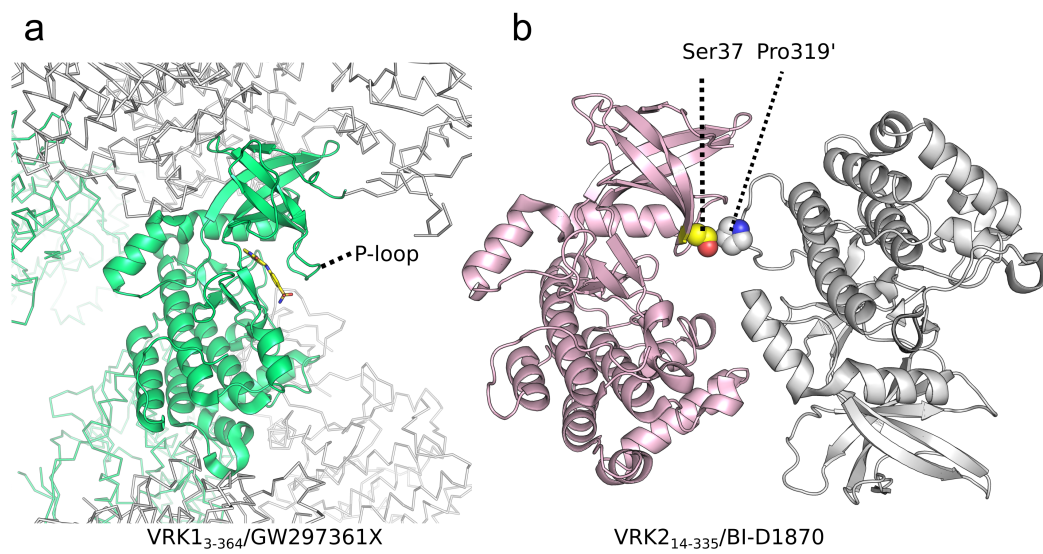

## SUPPLEMENTARY TABLES

Supplementary Table S1

| Supplementary Table S1 - VRK1 DSF PKIS hits (68 kinases tested) |                                                |                           |                                                                           |
|-----------------------------------------------------------------|------------------------------------------------|---------------------------|---------------------------------------------------------------------------|
| Compound<br>(PKIS number)                                       | Chemotype<br>(PKIS number)                     | VRK1 $\Delta T_m$<br>(°C) | Number of kinases with<br>$\Delta T_m > 2.0^\circ\text{C}$ (rank of VRK1) |
| GW297361X                                                       | 02:Oxindoles                                   | 9.7                       | 46 (10)                                                                   |
| GW589933X                                                       | 02:Oxindoles                                   | 8.0                       | 50 (13)                                                                   |
| GW770249A                                                       | 18:Fuopyrimidines_and_related                  | 7.4                       | 31 (8)                                                                    |
| GW405841X                                                       | 02:Oxindoles                                   | 6.3                       | 30 (11)                                                                   |
| GW290597X                                                       | 02:Oxindoles                                   | 6.0                       | 22 (7)                                                                    |
| GW406108X                                                       | 02:Oxindoles                                   | 5.9                       | 32 (16)                                                                   |
| GW770249X                                                       | 18:Fuopyrimidines_and_related                  | 4.9                       | 34 (13)                                                                   |
| GW300660X                                                       | 02:Oxindoles                                   | 4.8                       | 26 (16)                                                                   |
| GW305178X                                                       | 02:Oxindoles                                   | 4.7                       | 31 (18)                                                                   |
| GW795486X                                                       | 18:Fuopyrimidines_and_related                  | 4.5                       | 21 (11)                                                                   |
| GW429374A                                                       | 02:Oxindoles                                   | 4.3                       | 27 (19)                                                                   |
| GW300657X                                                       | 02:Oxindoles                                   | 4.2                       | 28 (13)                                                                   |
| GW831091X                                                       | 27:3-amino_pyrazoles                           | 3.6                       | 22 (10)                                                                   |
| GW416981X                                                       | 02:Oxindoles                                   | 3.6                       | 45 (34)                                                                   |
| GW407323A                                                       | 02:Oxindoles                                   | 3.5                       | 24 (12)                                                                   |
| GW711782X                                                       | 06:4-pyridyl_ortho-aryl_azoles                 | 3.1                       | 9 (4)                                                                     |
| GW795493X                                                       | 18:Fuopyrimidines_and_related                  | 3.0                       | 34 (24)                                                                   |
| GW779439X                                                       | 07:2H-<br>3_pyrimidinyl_pyrazolopyridazines    | 2.9                       | 51 (47)                                                                   |
| GW305074X                                                       | 02:Oxindoles                                   | 2.8                       | 25 (20)                                                                   |
| GW695874X                                                       | 06:4-pyridyl_ortho-aryl_azoles                 | 2.8                       | 6 (4)                                                                     |
| SB-236687                                                       | 01:4-pyrimidinyl_ortho-aryl_azoles             | 2.7                       | 7 (7)                                                                     |
| GSK312948A                                                      | 05:Benimidazole_N-thiophenes                   | 2.7                       | 17 (10)                                                                   |
| GW806742X                                                       | 16:2,4-diamino_pyrimidines                     | 2.4                       | 37 (35)                                                                   |
| GW837331X                                                       | 28:Imidazotriazine                             | 2.3                       | 28 (23)                                                                   |
| GW852849X                                                       | 05:Benimidazole_N-thiophenes                   | 2.1                       | 15 (14)                                                                   |
| GW280670X                                                       | 02:Oxindoles                                   | 2.1                       | 26 (26)                                                                   |
| GW829055X                                                       | 2-aryl_3-<br>pyridimidinyl_pyrazolopyridazines | 2.0                       | 20 (20)                                                                   |



Supplementary table S2

| Supplementary Table S2: Selleckchem Kinase Inhibitor set |                                  |              |                             |                              |       |
|----------------------------------------------------------|----------------------------------|--------------|-----------------------------|------------------------------|-------|
| Well                                                     | Compound                         | M.W.<br>(Da) | Known Targets               | $\Delta T_m$ ( $^{\circ}C$ ) |       |
|                                                          |                                  |              |                             | VRK1                         | VRK2  |
| A01                                                      | Linifanib (ABT-869)              | 375.41       | CSF-1R,PDGFR,VEGFR          | -0.14                        | 0.31  |
| A02                                                      | ENMD-2076                        | 375.47       | Aurora Kinase,FLT3,VEGFR    | 0.31                         | 0.26  |
| A03                                                      | Cediranib (AZD2171)              | 450.51       | VEGFR                       | -0.24                        | 0.07  |
| A04                                                      | Amuvatinib (MP-470)              | 447.51       | FLT3,c-RET,PDGFR,c-Kit      | #N/D                         | #N/D  |
| A05                                                      | Lapatinib (GW-572016) Ditosylate | 925.46       | HER2,EGFR                   | 0.68                         | 0.03  |
| A06                                                      | TG100-115                        | 346.34       | PI3K                        | -0.05                        | 0.43  |
| A07                                                      | Sorafenib Tosylate               | 637.03       | PDGFR,Raf,VEGFR             | #N/D                         | 0.48  |
| A08                                                      | PHA-680632                       | 501.62       | Aurora Kinase               | 0.13                         | 0.40  |
| A09                                                      | AC480 (BMS-599626)               | 567.01       | HER2,EGFR                   | -0.71                        | 0.19  |
| A10                                                      | HMN-214                          | 424.47       | PLK                         | -0.05                        | 0.25  |
| A11                                                      | SB203580                         | 377.43       | p38 MAPK                    | -0.22                        | 0.58  |
| A12                                                      | AT7519                           | 382.24       | CDK                         | -0.03                        | 0.22  |
| A13                                                      | KU-55933 (ATM Kinase Inhibitor)  | 395.49       | ATM/ATR                     | -0.45                        | -0.14 |
| A14                                                      | AZD8055                          | 465.54       | mTOR                        | 0.00                         | 0.10  |
| A15                                                      | LY294002                         | 307.34       | Autophagy,PI3K              | -0.27                        | 0.03  |
| A16                                                      | Fasudil (HA-1077) HCl            | 327.83       | ROCK,Autophagy              | -0.35                        | 0.74  |
| A17                                                      | Palbociclib (PD-0332991) HCl     | 483.99       | CDK                         | -0.40                        | #N/D  |
| A18                                                      | AZD8330                          | 461.23       | MEK                         | -0.19                        | 0.09  |
| A19                                                      | Brivanib Alaninate (BMS-582664)  | 441.46       | VEGFR,FGFR                  | -0.31                        | #N/D  |
| A20                                                      | GSK461364                        | 543.60       | PLK                         | -0.15                        | -0.04 |
| A21                                                      | CP-724714                        | 469.53       | EGFR,HER2                   | -0.32                        | 0.18  |
| A22                                                      | Mubritinib (TAK 165)             | 468.47       | HER2                        | -0.13                        | 0.09  |
| A23                                                      | JNK Inhibitor IX                 | 332.42       | JNK                         | -1.29                        | -0.07 |
| A24                                                      | Tyrphostin AG 1296               | 266.29       | FGFR,c-Kit,PDGFR            | -0.50                        | 0.82  |
| B01                                                      | Axitinib                         | 386.47       | c-Kit,VEGFR,PDGFR           | -0.11                        | -0.18 |
| B02                                                      | CUDC-101                         | 434.49       | HDAC,HER2,EGFR              | -0.25                        | 0.00  |
| B03                                                      | Dovitinib (TKI-258, CHIR-258)    | 392.43       | FGFR,FLT3,c-Kit,VEGFR,PDGFR | 0.33                         | 0.67  |
| B04                                                      | JNJ-7706621                      | 394.36       | CDK,Aurora Kinase           | 0.49                         | 0.28  |
| B05                                                      | Motesanib Diphosphate (AMG-706)  | 569.44       | VEGFR,PDGFR,c-Kit           | -0.23                        | -0.22 |
| B06                                                      | GSK1059615                       | 333.36       | PI3K,mTOR                   | 0.43                         | 0.71  |
| B07                                                      | Sunitinib Malate                 | 532.56       | VEGFR,PDGFR,c-Kit           | -0.10                        | 0.37  |
| B08                                                      | VX-745                           | 436.26       | p38 MAPK                    | -0.37                        | -0.12 |
| B09                                                      | Masitinib (AB1010)               | 498.64       | PDGFR,c-Kit                 | -0.02                        | 0.40  |
| B10                                                      | AEE788 (NVP-AEE788)              | 440.58       | HER2,VEGFR,EGFR             | -0.21                        | -0.10 |
| B11                                                      | SB202190 (FHPI)                  | 331.34       | p38 MAPK                    | #N/D                         | 0.70  |
| B12                                                      | Quizartinib (AC220)              | 560.67       | FLT3                        | -1.17                        | #N/D  |
| B13                                                      | GSK1904529A                      | 851.96       | IGF-1R                      | -0.26                        | 0.06  |
| B14                                                      | PHT-427                          | 409.61       | PKD-1,Akt                   | -0.74                        | -1.10 |
| B15                                                      | OSU-03012 (AR-12)                | 460.45       | PKD-1                       | #N/D                         | 0.16  |
| B16                                                      | BIRB 796 (Doramapimod)           | 527.66       | p38 MAPK                    | -0.13                        | 0.10  |

|     |                                    |         |                                  |       |       |
|-----|------------------------------------|---------|----------------------------------|-------|-------|
| B17 | Triciribine                        | 320.30  | Akt                              | -0.03 | #N/D  |
| B18 | KW-2449                            | 332.40  | Aurora Kinase,Bcr-Abl,FLT3       | -0.15 | 0.45  |
| B19 | AG-490 (Tyrphostin B42)            | 294.30  | JAK,EGFR                         | -0.16 | 0.65  |
| B20 | R406                               | 628.63  | Syk,FLT3                         | -0.57 | 0.07  |
| B21 | TGX-221                            | 364.44  | PI3K                             | -0.09 | 0.36  |
| B22 | PP242                              | 308.34  | mTOR,Autophagy                   | 0.35  | 0.45  |
| B23 | PQ 401                             | 341.79  | IGF-1R                           | 0.16  | -0.02 |
| B24 | P276-00                            | 438.30  | CDK                              | 0.08  | 0.47  |
| C01 | Saracatinib (AZD0530)              | 542.03  | Src,Bcr-Abl                      | -0.04 | -0.35 |
| C02 | PIK-75                             | 488.74  | PI3K,DNA-PK                      | 4.35  | 4.18  |
| C03 | PD184352 (CI-1040)                 | 478.67  | MEK                              | -0.08 | -0.54 |
| C04 | PD173074                           | 523.67  | VEGFR,FGFR                       | -0.35 | 0.09  |
| C05 | Nilotinib (AMN-107)                | 529.52  | Bcr-Abl                          | 0.95  | -0.19 |
| C06 | MGCD-265                           | 517.60  | Tie-2,VEGFR,c-Met                | -3.37 | -1.67 |
| C07 | Tandutinib (MLN518)                | 562.70  | FLT3                             | -0.24 | 0.08  |
| C08 | Thiazovivin                        | 311.36  | ROCK                             | -0.22 | 0.15  |
| C09 | GDC-0941                           | 513.64  | PI3K                             | -0.03 | 0.01  |
| C10 | PHA-793887                         | 361.48  | CDK                              | 0.36  | 1.27  |
| C11 | MK-2206 2HCl                       | 480.39  | Akt                              | -0.02 | 0.14  |
| C12 | Hesperadin                         | 516.65  | Aurora Kinase                    | 0.10  | 1.50  |
| C13 | PF-04217903                        | 372.38  | c-Met                            | -0.13 | -0.22 |
| C14 | KRN 633                            | 416.86  | PDGFR,VEGFR                      | -0.30 | 0.13  |
| C15 | Danuseritib (PHA-739358)           | 474.55  | c-RET,FGFR,Bcr-Abl,Aurora Kinase | 0.35  | 0.62  |
| C16 | Tie2 kinase inhibitor              | 439.53  | Tie-2                            | -0.15 | -0.31 |
| C17 | XL147                              | 448.52  | PI3K                             | 0.21  | -0.11 |
| C18 | RAF265 (CHIR-265)                  | 518.41  | VEGFR,Raf                        | 1.77  | -2.81 |
| C19 | SNS-032 (BMS-387032)               | 380.53  | CDK                              | -0.17 | 0.31  |
| C20 | SGL-1776 free base                 | 405.42  | Pim                              | 0.04  | 0.72  |
| C21 | WZ3146                             | 464.95  | EGFR                             | -0.39 | 0.11  |
| C22 | CYT387                             | 414.46  | JAK                              | -0.15 | -0.09 |
| C23 | XMD8-92                            | 474.55  | ERK                              | -0.36 | 0.23  |
| C24 | NSC 23766                          | 530.96  | Rac                              | -0.18 | 0.14  |
| D01 | Selumetinib (AZD6244)              | 457.68  | MEK                              | -0.07 | -0.08 |
| D02 | Tivozanib (AV-951)                 | 454.86  | VEGFR,PDGFR,c-Kit                | 0.34  | -0.44 |
| D03 | Dasatinib                          | 488.01  | Bcr-Abl,c-Kit,Src                | -0.19 | 0.80  |
| D04 | WYE-354                            | 495.53  | mTOR                             | -2.91 | -0.50 |
| D05 | NVP-AEW541                         | 439.55  | IGF-1R                           | -0.23 | 0.31  |
| D06 | Rigosertib (ON-01910)              | 473.47  | PLK                              | -0.17 | 0.02  |
| D07 | Temsirolimus (CCI-779, NSC 683864) | 1030.29 | mTOR                             | -0.43 | -0.75 |
| D08 | SP600125                           | 220.23  | JNK                              | 0.73  | 1.86  |
| D09 | SL-327                             | 335.35  | MEK                              | -0.23 | -0.04 |
| D10 | PIK-93                             | 389.88  | PI3K                             | -0.07 | -0.11 |
| D11 | SU11274                            | 568.09  | c-Met                            | -0.03 | -0.37 |
| D12 | BIX 02188                          | 412.48  | MEK                              | 0.64  | 0.29  |
| D13 | MLN8054                            | 476.86  | Aurora Kinase                    | -0.20 | -0.40 |
| D14 | AT7867                             | 337.85  | S6 Kinase,Akt                    | 0.13  | -0.09 |

|     |                                      |        |                                       |       |       |
|-----|--------------------------------------|--------|---------------------------------------|-------|-------|
| D15 | BI 2536                              | 521.66 | PLK                                   | -0.08 | 0.07  |
| D16 | H 89 2HCl                            | 519.28 | PKA                                   | -0.16 | -0.05 |
| D17 | Cabozantinib (XL184, BMS-907351)     | 501.51 | FLT3,Tie-2,c-Kit,c-Met,VEGFR,Axl      | 0.05  | 0.37  |
| D18 | AZD1480                              | 348.77 | JAK                                   | -0.12 | 0.36  |
| D19 | Barasertib (AZD1152-HQPA)            | 507.56 | Aurora Kinase                         | -0.04 | 0.11  |
| D20 | BMS-794833                           | 468.84 | VEGFR,c-Met                           | 1.11  | 3.30  |
| D21 | CYC116                               | 368.46 | Aurora Kinase,VEGFR                   | 0.08  | 0.17  |
| D22 | SB590885                             | 453.54 | Raf                                   | -0.24 | -0.22 |
| D23 | ZM 39923 HCl                         | 367.91 | JAK                                   | -1.00 | -6.08 |
| D24 | Bardoxolone Methyl                   | 505.69 | IκB/IKK                               | -1.09 | -2.72 |
| E01 | Nintedanib (BIBF 1120)               | 539.62 | VEGFR,PDGFR,FGFR                      | -0.13 | 0.04  |
| E02 | YM201636                             | 467.48 | PI3K                                  | -0.16 | -0.49 |
| E03 | Ridaforolimus (Deforolimus, MK-8669) | 990.21 | mTOR                                  | -0.43 | -0.51 |
| E04 | Vemurafenib (PLX4032, RG7204)        | 489.92 | Raf                                   | #N/D  | 1.32  |
| E05 | Pazopanib HCl (GW786034 HCl)         | 473.98 | VEGFR,PDGFR,c-Kit                     | -0.34 | -0.01 |
| E06 | Ki8751                               | 469.41 | PDGFR,c-Kit,VEGFR                     | 1.14  | 0.41  |
| E07 | Vandetanib (ZD6474)                  | 475.35 | VEGFR                                 | -0.43 | -0.23 |
| E08 | AZD6482                              | 408.45 | PI3K                                  | -0.18 | -0.28 |
| E09 | Crizotinib (PF-02341066)             | 450.34 | c-Met,ALK                             | -0.35 | -0.49 |
| E10 | Ponatinib (AP24534)                  | 532.56 | PDGFR,FGFR,VEGFR,Bcr-Abl              | -0.54 | -0.80 |
| E11 | Brivanib (BMS-540215)                | 370.38 | FGFR,VEGFR                            | -0.09 | -0.84 |
| E12 | BIX 02189                            | 440.54 | MEK                                   | -0.12 | -0.21 |
| E13 | Vatalanib (PTK787) 2HCl              | 419.73 | c-Kit,VEGFR                           | -0.52 | -0.37 |
| E14 | BMS-777607                           | 512.89 | Axl,c-Met                             | -0.21 | -0.30 |
| E15 | Foretinib (GSK1363089)               | 632.65 | VEGFR,c-Met                           | 0.15  | -0.33 |
| E16 | TWS119                               | 318.33 | GSK-3                                 | 0.02  | -0.27 |
| E17 | Everolimus (RAD001)                  | 958.22 | mTOR                                  | -0.68 | -1.02 |
| E18 | PF-4708671                           | 390.41 | S6 Kinase                             | -0.31 | 0.38  |
| E19 | PLX-4720                             | 413.83 | Raf                                   | -0.38 | -0.58 |
| E20 | NVP-BHG712                           | 503.48 | Raf,Src,Bcr-Abl,VEGFR,Ephrin receptor | 0.93  | -0.19 |
| E21 | WZ4002                               | 494.18 | EGFR                                  | -0.55 | -0.32 |
| E22 | Apatinib                             | 493.58 | VEGFR                                 | -0.37 | -0.01 |
| E23 | GNF-5                                | 418.37 | Bcr-Abl                               | -0.05 | -0.34 |
| E24 | PRT062607 (P505-15, BIIB057) HCl     | 429.91 | Syk                                   | 0.01  | 0.94  |
| F01 | Afatinib (BIBW2992)                  | 485.94 | EGFR,HER2                             | -0.28 | -0.20 |
| F02 | OSI-930                              | 443.44 | c-Kit,CSF-1R,VEGFR                    | 1.11  | -0.38 |
| F03 | Erlotinib HCl (OSI-744)              | 429.90 | Autophagy,EGFR                        | -0.15 | -0.38 |
| F04 | BX-795                               | 591.47 | IκB/IKK,PDK-1                         | 0.16  | 0.70  |
| F05 | PD0325901                            | 482.19 | MEK                                   | -0.21 | -0.21 |
| F06 | Ruxolitinib (INCB018424)             | 306.37 | JAK                                   | -0.04 | 0.67  |
| F07 | VX-680 (Tozasertib, MK-0457)         | 464.59 | Aurora Kinase                         | 0.53  | -0.64 |
| F08 | TSU-68 (SU6668, Orantinib)           | 310.35 | VEGFR,PDGFR,FGFR                      | -0.07 | 1.41  |
| F09 | PHA-665752                           | 641.61 | c-Met                                 | -0.60 | -0.58 |
| F10 | LY2228820                            | 612.74 | p38 MAPK                              | 0.96  | 2.65  |
| F11 | NVP-ADW742                           | 453.58 | IGF-1R                                | -0.14 | 0.06  |
| F12 | AZD7762                              | 362.42 | Chk                                   | -0.02 | -0.10 |

|     |                                    |        |                            |       |       |
|-----|------------------------------------|--------|----------------------------|-------|-------|
| F13 | U0126-EtOH                         | 426.56 | MEK                        | -0.03 | -0.20 |
| F14 | PD318088                           | 561.09 | MEK                        | 0.07  | -0.83 |
| F15 | SGX-523                            | 359.41 | c-Met                      | -0.04 | -0.30 |
| F16 | Acadesine                          | 258.23 | AMPK                       | 0.03  | -0.22 |
| F17 | BMS-754807                         | 461.49 | IGF-1R,Trk receptor,c-Met  | -0.35 | -0.50 |
| F18 | LY2784544                          | 469.94 | JAK                        | -0.54 | -0.04 |
| F19 | Roscovitine (Seliciclib,CYC202)    | 354.45 | CDK                        | -0.45 | 1.95  |
| F20 | OSI-420                            | 415.87 | EGFR                       | -0.19 | -0.15 |
| F21 | PD98059                            | 267.28 | MEK                        | -0.37 | -0.26 |
| F22 | CAL-101 (Idelalisib, GS-1101)      | 415.42 | PI3K                       | -0.43 | -0.11 |
| F23 | SMI-4a                             | 273.23 | Pim                        | -0.65 | -0.71 |
| F24 | DMSO                               | 78.13  | reference                  | -0.09 | -0.10 |
| G01 | BMS-536924                         | 479.96 | IGF-1R                     | 0.83  | 0.69  |
| G02 | KU-0063794                         | 465.54 | mTOR                       | -0.09 | -0.46 |
| G03 | Gefitinib (ZD1839)                 | 446.90 | EGFR                       | -0.36 | -0.23 |
| G04 | BX-912                             | 471.35 | PDK-1                      | 0.07  | 0.62  |
| G05 | PI-103                             | 348.36 | PI3K,Autophagy,DNA-PK,mTOR | -0.13 | -0.20 |
| G06 | Pelitinib (EKB-569)                | 467.92 | EGFR                       | 0.43  | 0.29  |
| G07 | Y-27632 2HCl                       | 320.26 | Autophagy,ROCK             | -0.14 | -0.01 |
| G08 | GSK429286A                         | 432.37 | ROCK                       | -0.10 | -0.35 |
| G09 | ZSTK474                            | 417.41 | PI3K                       | -0.12 | -0.21 |
| G10 | CCT129202                          | 497.02 | Aurora Kinase              | -0.21 | 2.46  |
| G11 | Refametinib (RDEA119, Bay 86-9766) | 572.34 | MEK                        | -0.04 | -0.42 |
| G12 | R406 (free base)                   | 470.45 | Syk                        | -0.30 | -0.44 |
| G13 | ZM 447439                          | 513.59 | Aurora Kinase              | 0.81  | 0.03  |
| G14 | KU-60019                           | 547.67 | ATM/ATR                    | -0.29 | -0.34 |
| G15 | GSK690693                          | 425.48 | Akt                        | -0.15 | -0.42 |
| G16 | PF-573228                          | 491.49 | FAK                        | -0.03 | 1.40  |
| G17 | Alisertib (MLN8237)                | 518.92 | Aurora Kinase              | 0.71  | -0.62 |
| G18 | AST-1306                           | 621.08 | EGFR                       | #N/D  | #N/D  |
| G19 | SNS-314 Mesylate                   | 527.04 | Aurora Kinase              | 0.82  | 0.18  |
| G20 | PIK-293                            | 397.43 | PI3K                       | -0.59 | -0.13 |
| G21 | Regorafenib (BAY 73-4506)          | 482.82 | c-RET,VEGFR                | #N/D  | #N/D  |
| G22 | PIK-294                            | 489.53 | PI3K                       | -0.25 | -0.40 |
| G23 | GNE-7915                           | 443.4  | LRRK2                      | -0.15 | -0.04 |
| G24 | Butein                             | 272.25 | EGFR                       | -1.67 | 1.23  |
| H01 | Bosutinib (SKI-606)                | 530.45 | Src                        | 0.13  | 0.25  |
| H02 | AG-1024                            | 305.17 | IGF-1R                     | 1.26  | 0.90  |
| H03 | Imatinib Mesylate (STI571)         | 589.71 | c-Kit,Bcr-Abl,PDGFR        | -0.31 | -0.18 |
| H04 | Genistein                          | 270.24 | Topoisomerase,EGFR         | #N/D  | 0.79  |
| H05 | Rapamycin (Sirolimus)              | 914.18 | Autophagy,mTOR             | -0.31 | -0.86 |
| H06 | Aurora A Inhibitor I               | 588.07 | Aurora Kinase              | -0.06 | -0.29 |
| H07 | Enzastaurin (LY317615)             | 515.61 | PKC                        | -0.64 | -0.75 |
| H08 | Pimasertib (AS-703026)             | 431.20 | MEK                        | -0.18 | -0.40 |
| H09 | SB216763                           | 371.22 | GSK-3                      | -0.69 | -0.86 |
| H10 | SAR245409 (XL765)                  | 599.66 | PI3K,mTOR                  | -0.32 | -0.79 |

|     |                                |        |                           |       |        |
|-----|--------------------------------|--------|---------------------------|-------|--------|
| H11 | OSI-906 (Linsitinib)           | 421.49 | IGF-1R                    | -0.25 | -0.64  |
| H12 | CP-673451                      | 417.50 | PDGFR                     | 0.04  | -0.12  |
| H13 | GDC-0879                       | 334.37 | Raf                       | -0.14 | -0.16  |
| H14 | BS-181 HCl                     | 416.99 | CDK                       | -0.15 | 0.38   |
| H15 | JNJ-38877605                   | 377.35 | c-Met                     | -0.47 | -0.27  |
| H16 | BMS-265246                     | 345.34 | CDK                       | -0.16 | -0.47  |
| H17 | AT9283                         | 381.43 | JAK,Aurora Kinase,Bcr-Abl | 0.07  | -0.18  |
| H18 | AZD8931 (Sapitinib)            | 473.93 | HER2,EGFR                 | -0.74 | -0.22  |
| H19 | Lenvatinib (E7080)             | 426.85 | VEGFR                     | -0.33 | -0.21  |
| H20 | AZ 960                         | 354.36 | JAK                       | -0.45 | 0.09   |
| H21 | WZ8040                         | 481.01 | EGFR                      | -0.62 | -0.16  |
| H22 | Telatinib                      | 409.83 | VEGFR,PDGFR,c-Kit         | 0.97  | -0.41  |
| H23 | VE-821                         | 368.41 | ATM/ATR                   | -0.42 | -0.09  |
| H24 | Staurosporine                  | 466.53 | multiple                  | 2.89  | 1.55   |
| I01 | Volasertib (BI 6727)           | 618.81 | PLK                       | -0.03 | -0.22  |
| I02 | WHI-P154                       | 376.20 | JAK,EGFR                  | 0.81  | 0.90   |
| I03 | Chrysophanic Acid              | 254.24 | mTOR,EGFR                 | -0.36 | 0.01   |
| I04 | GNF-2                          | 374.32 | Bcr-Abl                   | -3.26 | 0.74   |
| I05 | LY2603618                      | 436.30 | Chk                       | -0.19 | -0.18  |
| I06 | Pazopanib                      | 437.52 | PDGFR,c-Kit,VEGFR         | -0.46 | 0.49   |
| I07 | AS-252424                      | 305.28 | PI3K                      | 3.29  | 0.89   |
| I08 | AP26113                        | 529.01 | ALK                       | -0.16 | -0.14  |
| I09 | NVP-BSK805 2HCl                | 563.47 | JAK                       | -0.19 | -0.35  |
| I10 | CX-6258 HCl                    | 498.4  | Pim                       | -0.46 | 0.05   |
| I11 | GSK1838705A                    | 532.57 | IGF-1R,ALK                | -0.18 | 0.29   |
| I12 | IPA-3                          | 350.45 | PAK                       | -5.37 | -12.98 |
| I13 | Crenolanib (CP-868596)         | 443.54 | PDGFR                     | -0.49 | 0.15   |
| I14 | AZD1080                        | 334.37 | GSK-3                     | -0.20 | 0.14   |
| I15 | BGT226 (NVP-BGT226)            | 650.60 | PI3K,mTOR                 | 0.87  | 0.63   |
| I16 | RKI-1447                       | 326.37 | ROCK                      | -0.45 | -0.28  |
| I17 | Dinaciclib (SCH727965)         | 396.49 | CDK                       | -0.11 | 0.09   |
| I18 | Ro3280                         | 543.61 | PLK                       | -0.42 | -0.05  |
| I19 | WP1066                         | 356.22 | JAK                       | -0.31 | -2.96  |
| I20 | ZCL278                         | 584.89 | Rac                       | 0.98  | -0.05  |
| I21 | Torin 2                        | 432.40 | ATM/ATR,mTOR              | 0.66  | 0.57   |
| I22 | GNE-0877                       | 339.32 | LRRK2                     | -0.29 | 0.27   |
| I23 | WH-4-023                       | 568.67 | Src                       | -0.75 | -0.06  |
| I24 | GDC-0349                       | 452.55 | mTOR                      | -0.21 | 0.10   |
| J01 | Palomid 529 (P529)             | 406.43 | mTOR                      | #N/D  | -0.46  |
| J02 | TG100713                       | 254.25 | PI3K                      | 0.46  | 0.12   |
| J03 | Imatinib (STI571)              | 493.60 | PDGFR                     | -0.26 | 0.06   |
| J04 | S-Ruxolitinib (INCB018424)     | 306.37 | JAK                       | -0.19 | 1.11   |
| J05 | DCC-2036 (Rebastinib)          | 553.59 | Bcr-Abl                   | -0.33 | -0.30  |
| J06 | Piceatannol                    | 244.24 | Syk                       | 0.53  | -0.36  |
| J07 | PF-00562271                    | 665.66 | FAK                       | -0.12 | 1.82   |
| J08 | MEK162 (ARRY-162, ARRY-438162) | 441.23 | MEK                       | -0.04 | -0.09  |

|     |                                   |        |                             |       |       |
|-----|-----------------------------------|--------|-----------------------------|-------|-------|
| J09 | R547                              | 441.45 | CDK                         | -0.24 | 0.15  |
| J10 | AZ20                              | 412.51 | ATM/ATR                     | -0.33 | -0.25 |
| J11 | TAK-901                           | 504.64 | Aurora Kinase               | -0.19 | 0.31  |
| J12 | PF-3758309                        | 490.62 | PAK                         | 0.46  | 1.58  |
| J13 | MK-8776 (SCH 900776)              | 376.25 | CDK,Chk                     | -0.07 | 0.02  |
| J14 | 10058-F4                          | 249.35 | c-Myc                       | -0.10 | -0.35 |
| J15 | Milciclib (PHA-848125)            | 460.57 | CDK                         | -0.38 | 0.48  |
| J16 | BIO                               | 356.17 | GSK-3                       | 0.32  | 0.99  |
| J17 | Dovitinib (TKI-258) Dilactic Acid | 572.59 | PDGFR,FGFR,c-Kit,FLT3,VEGFR | -0.18 | 0.90  |
| J18 | AZD2858                           | 453.52 | GSK-3                       | -0.17 | -0.01 |
| J19 | AZD4547                           | 463.57 | FGFR                        | -0.38 | -0.11 |
| J20 | AZD9291                           | 499.61 | EGFR                        | -0.51 | -0.09 |
| J21 | TAE226 (NVP-TAE226)               | 468.94 | FAK                         | -0.55 | 0.12  |
| J22 | GNE-9605                          | 449.83 | LRRK2                       | -0.32 | 0.78  |
| J23 | AG-18                             | 186.17 | EGFR                        | -0.64 | 0.24  |
| K01 | Degrasyn (WP1130)                 | 384.27 | DUB,Bcr-Abl                 | -0.33 | -5.10 |
| K02 | GW5074                            | 520.94 | Raf                         | #N/D  | -0.94 |
| K03 | Phenformin HCl                    | 241.72 | AMPK                        | -0.25 | 0.03  |
| K04 | PF-477736                         | 419.48 | Chk                         | -0.28 | 0.09  |
| K05 | CCT128930                         | 341.84 | Akt                         | 0.02  | 0.88  |
| K06 | Cabozantinib malate (XL184)       | 635.59 | VEGFR                       | #N/D  | 0.50  |
| K07 | Trametinib (GSK1120212)           | 615.39 | MEK                         | -0.50 | -0.56 |
| K08 | PP2                               | 301.77 | Src                         | -0.19 | -0.15 |
| K09 | WAY-600                           | 494.59 | mTOR                        | -0.32 | -0.19 |
| K10 | CGI1746                           | 579.69 | BTK                         | -0.09 | -0.64 |
| K11 | AMG-900                           | 503.58 | Aurora Kinase               | -1.72 | -0.36 |
| K12 | VE-822                            | 463.55 | ATM/ATR                     | 0.33  | 0.05  |
| K13 | TG101348 (SAR302503)              | 524.68 | JAK                         | -0.47 | 0.06  |
| K14 | LY2835219                         | 602.70 | CDK                         | -0.24 | -0.25 |
| K15 | HER2-Inhibitor-1                  | 569.63 | HER2,EGFR                   | -0.16 | 0.87  |
| K16 | CNX-2006                          | 545.53 | EGFR                        | -0.33 | -0.18 |
| K17 | MK-5108 (VX-689)                  | 461.94 | Aurora Kinase               | -0.06 | 0.81  |
| K18 | NMS-P937 (NMS1286937)             | 532.52 | PLK                         | -0.15 | -0.20 |
| K19 | CEP-33779                         | 462.57 | JAK                         | -0.38 | -0.16 |
| K20 | WZ4003                            | 496.99 | AMPK                        | -0.56 | -0.13 |
| K21 | TPCA-1                            | 279.29 | IkB/IKK                     | 0.88  | 0.26  |
| K22 | Sorafenib                         | 464.82 | Raf                         | #N/D  | #N/D  |
| K23 | IM-12                             | 377.41 | GSK-3                       | -0.57 | -0.12 |
| K24 | BMS-345541                        | 255.32 | IkB/IKK                     | -0.22 | 0.52  |
| L01 | BKM120 (NVP-BKM120, Buparlisib)   | 410.39 | PI3K                        | -0.49 | 0.34  |
| L02 | IKK-16 (IKK Inhibitor VII)        | 483.63 | IkB/IKK                     | -0.28 | -0.30 |
| L03 | TAK-733                           | 504.23 | MEK                         | -0.38 | -0.09 |
| L04 | Go 6983                           | 442.51 | PKC                         | -0.38 | 0.08  |
| L05 | A66                               | 393.53 | PI3K                        | -0.18 | -0.23 |
| L06 | JNK-IN-8                          | 507.59 | JNK                         | -0.31 | -0.37 |
| L07 | Flavopiridol HCl                  | 438.30 | CDK                         | 1.42  | 3.52  |

|     |                                 |        |                        |       |       |
|-----|---------------------------------|--------|------------------------|-------|-------|
| L08 | VS-5584 (SB2343)                | 354.41 | PI3K                   | -0.19 | -0.25 |
| L09 | TG101209                        | 509.67 | JAK,FLT3,c-RET         | -0.64 | 0.33  |
| L10 | PP1                             | 281.36 | Src                    | 0.11  | 0.56  |
| L11 | ZM 336372                       | 389.45 | Raf                    | -0.06 | 0.15  |
| L12 | AZD1208                         | 379.48 | Pim                    | -0.20 | 0.04  |
| L13 | PHA-767491                      | 213.24 | CDK                    | -0.03 | 0.17  |
| L14 | SSR128129E                      | 346.31 | FGFR                   | -0.30 | 0.00  |
| L15 | Varlitinib                      | 466.94 | EGFR                   | -0.23 | -0.34 |
| L16 | Ro 31-8220 Mesylate             | 553.65 | PKC                    | 0.40  | 1.12  |
| L17 | MK-2461                         | 495.55 | c-Met,PDGFR,FGFR       | -0.22 | 0.21  |
| L18 | CNX-774                         | 499.50 | BTK                    | 1.04  | 0.06  |
| L19 | Dabrafenib (GSK2118436)         | 519.56 | Raf                    | -0.41 | -0.13 |
| L20 | EHop-016                        | 430.55 | Rac                    | -0.49 | 0.15  |
| L21 | SAR131675                       | 358.39 | VEGFR                  | -0.31 | -0.02 |
| L22 | KN-62                           | 721.84 | Others                 | -0.92 | -1.17 |
| L23 | CEP-32496                       | 517.46 | CSF-1R,Raf             | #N/D  | -0.21 |
| M01 | Asiatic Acid                    | 488.70 | p38 MAPK               | -0.23 | -0.50 |
| M02 | PF-562271                       | 507.49 | FAK                    | -0.08 | 2.00  |
| M03 | AZD5438                         | 371.46 | CDK                    | -0.01 | 0.30  |
| M04 | BAY 11-7082                     | 207.25 | IκB/IKK,E2 conjugating | 1.02  | -2.33 |
| M05 | NU7441 (KU-57788)               | 413.49 | DNA-PK,PI3K            | -0.66 | -1.11 |
| M06 | SC-514                          | 224.30 | IκB/IKK                | -0.55 | -0.33 |
| M07 | Ibrutinib (PCI-32765)           | 440.50 | BTK                    | -0.48 | -0.62 |
| M08 | CZC24832                        | 364.40 | PI3K                   | -0.04 | -0.20 |
| M09 | GDC-0980 (RG7422)               | 498.60 | mTOR,PI3K              | -0.16 | -0.12 |
| M10 | MK-8745                         | 431.91 | Aurora Kinase          | -0.10 | 0.23  |
| M11 | PH-797804                       | 477.30 | p38 MAPK               | -0.18 | -0.43 |
| M12 | AZD3463                         | 448.95 | ALK                    | -0.39 | 0.06  |
| M13 | PF-04691502                     | 425.48 | Akt,mTOR,PI3K          | -0.23 | -0.15 |
| M14 | AVL-292                         | 423.44 | BTK                    | -0.19 | -0.33 |
| M15 | Wortmannin                      | 428.43 | Autophagy,ATM/ATR,PI3K | -0.40 | -0.48 |
| M16 | GF109203X                       | 412.48 | PKC                    | -0.79 | -0.11 |
| M17 | AZD2014                         | 462.54 | mTOR                   | -0.33 | -0.34 |
| M18 | PD173955                        | 443.35 | BCR-ABL                | #N/D  | -1.32 |
| M19 | GDC-0068                        | 458.00 | Akt                    | -0.33 | -0.31 |
| M20 | TG003                           | 249.33 | CDK                    | 0.18  | -0.32 |
| M21 | BI-D1870                        | 391.42 | S6 Kinase              | 5.49  | 4.28  |
| M22 | KN-93 Phosphate                 | 599.03 | Others                 | -0.31 | -0.57 |
| M23 | Filgotinib (GLPG0634)           | 425.5  | JAK                    | -0.28 | -0.49 |
| M24 | ETP-46464                       | 470.52 | mTOR,ATM/ATR           | -0.49 | 0.20  |
| N01 | Honokiol                        | 266.33 | MEK,Akt                | 0.17  | -0.36 |
| N02 | Tyrphostin 9                    | 282.38 | EGFR                   | 0.32  | -0.49 |
| N03 | PP121                           | 319.36 | DNA-PK,PDGFR,mTOR      | 2.55  | 2.05  |
| N04 | Icotinib                        | 391.42 | EGFR                   | -0.07 | -0.40 |
| N05 | GSK2126458 (GSK458)             | 505.50 | PI3K,mTOR              | -0.39 | -0.34 |
| N06 | Tofacitinib (CP-690550) Citrate | 504.49 | JAK                    | -0.41 | -0.11 |

|     |                                     |         |                      |       |       |
|-----|-------------------------------------|---------|----------------------|-------|-------|
| N07 | AS-604850                           | 285.22  | PI3K                 | -0.22 | -0.84 |
| N08 | IPI-145 (INK1197)                   | 416.86  | PI3K                 | 0.16  | -0.47 |
| N09 | A-769662                            | 360.39  | AMPK                 | -0.40 | -0.79 |
| N10 | LDK378                              | 558.14  | ALK                  | -0.14 | -0.81 |
| N11 | Dacomitinib (PF299804, PF299)       | 469.94  | EGFR                 | -0.07 | -0.26 |
| N12 | NU6027                              | 251.28  | CDK                  | -0.11 | -0.06 |
| N13 | CCT137690                           | 551.48  | Aurora Kinase        | -0.14 | -0.39 |
| N14 | SKI II                              | 302.78  | S1P Receptor         | -2.32 | -0.06 |
| N15 | CUDC-907                            | 508.55  | PI3K,HDAC            | 0.10  | -0.49 |
| N16 | GSK650394                           | 382.45  | Others               | -0.34 | -2.40 |
| N17 | TAK-285                             | 547.96  | EGFR,HER2            | 1.54  | 0.57  |
| N18 | CO-1686 (AVL-301)                   | 555.55  | EGFR                 | -0.24 | -0.16 |
| N19 | INK 128 (MLN0128)                   | 309.33  | mTOR                 | 0.16  | -0.10 |
| N20 | 6H05                                | 590.14  | Rho                  | -0.18 | -0.61 |
| N21 | Semaxanib (SU5416)                  | 238.28  | VEGFR                | -0.35 | 1.52  |
| N22 | AR-A014418                          | 308.31  | GSK-3                | -0.59 | -0.82 |
| N23 | AZD5363                             | 428.92  | Akt                  | -0.13 | 0.54  |
| N24 | GW297361X                           | 372.417 | VRK1                 | 3.89  | 3.29  |
| O01 | Indirubin                           | 262.26  | GSK-3                | -1.00 | -0.14 |
| O02 | ZM 323881 HCl                       | 411.86  | VEGFR                | #N/D  | -0.32 |
| O03 | OSI-027                             | 406.44  | mTOR                 | -0.14 | -0.20 |
| O04 | CHIR-99021 (CT99021) HCl            | 501.80  | GSK-3                | -0.17 | -0.14 |
| O05 | WYE-125132 (WYE-132)                | 519.60  | mTOR                 | -0.10 | -0.27 |
| O06 | Fingolimod (FTY720) HCl             | 343.90  | S1P Receptor         | -0.20 | -0.50 |
| O07 | CAY10505                            | 289.28  | PI3K                 | -0.37 | -0.64 |
| O08 | XL019                               | 444.53  | JAK                  | -0.07 | -0.26 |
| O09 | CH5132799                           | 377.42  | mTOR,PI3K            | -0.07 | -0.21 |
| O10 | GSK2334470                          | 462.59  | PKD-1                | -0.33 | -0.26 |
| O11 | AG-1478 (Tyrphostin AG-1478)        | 315.75  | EGFR                 | -0.03 | 0.40  |
| O12 | TIC10                               | 386.49  | Akt                  | -0.01 | -0.31 |
| O13 | AZ 628                              | 451.52  | Raf                  | -0.43 | -0.25 |
| O14 | PF-543                              | 465.6   | S1P Receptor         | 0.00  | -0.72 |
| O15 | NVP-BVU972                          | 340.38  | c-Met                | -0.62 | -0.28 |
| O16 | Skepinone-L                         | 425.42  | p38 MAPK             | -0.07 | -0.92 |
| O17 | Tofacitinib (CP-690550,Tasocitinib) | 312.37  | JAK                  | -1.15 | 0.17  |
| O18 | PFK15                               | 260.29  | Others               | 3.30  | -5.11 |
| O19 | BYL719                              | 441.47  | PI3K                 | -0.80 | -0.50 |
| O20 | K-Ras(G12C) inhibitor 9             | 513.78  | Rho                  | -0.17 | -0.59 |
| O21 | Golitinib (E7050)                   | 633.69  | VEGFR,c-Met          | -0.80 | -0.52 |
| O22 | LDC000067                           | 370.43  | CDK                  | 1.40  | 0.10  |
| O23 | GSK2636771                          | 433.42  | PI3K                 | -0.85 | -0.10 |
| O24 | Pacritinib (SB1518)                 | 472.58  | JAK                  | -0.04 | 0.11  |
| P01 | Quercetin                           | 302.24  | PKC,Src,PI3K,Sirtuin | 1.12  | -0.14 |
| P02 | ZM 306416                           | 333.74  | VEGFR                | -0.02 | 0.97  |
| P03 | Fostamatinib (R788)                 | 580.46  | Syk                  | -0.07 | -0.47 |
| P04 | TAK-715                             | 399.51  | p38 MAPK             | -0.19 | -0.02 |



|     |                        |        |                |       |       |
|-----|------------------------|--------|----------------|-------|-------|
| P05 | A-674563               | 358.44 | PKA,CDK,Akt    | 1.23  | 1.73  |
| P06 | VX-702                 | 404.30 | p38 MAPK       | 0.14  | -0.22 |
| P07 | CHIR-124               | 419.91 | Chk            | 0.11  | 2.68  |
| P08 | PD168393               | 369.22 | EGFR           | 0.27  | -0.32 |
| P09 | KX2-391                | 431.53 | Src            | -0.01 | -0.55 |
| P10 | Zotatarolimus(ABT-578) | 966.21 | mTOR           | -0.27 | -0.96 |
| P11 | SB415286               | 359.72 | GSK-3          | 0.02  | -0.11 |
| P12 | CGK 733                | 555.84 | ATM/ATR        | -0.55 | 0.23  |
| P13 | AMG-458                | 539.58 | c-Met          | -0.11 | -0.34 |
| P14 | GZD824                 | 724.77 | Bcr-Abl        | -0.16 | -1.21 |
| P15 | 3-Methyladenine        | 149.15 | Autophagy,PI3K | 0.00  | -0.07 |
| P16 | Losmapimod (GW856553X) | 383.46 | p38 MAPK       | -0.26 | -0.32 |
| P17 | Sotrastaurin           | 438.48 | PKC            | 0.59  | 0.56  |
| P18 | TAK-632                | 554.52 | Raf            | -0.50 | #N/D  |
| P19 | Tyrphostin AG 879      | 316.46 | HER2           | 0.66  | 0.28  |
| P20 | HS-173                 | 422.46 | PI3K           | 0.48  | 0.26  |
| P21 | IMD 0354               | 383.67 | IkB/IKK        | 0.28  | -0.61 |
| P22 | EHT 1864               | 581.47 | Rho            | -0.44 | 0.07  |
| P23 | TCS 359                | 360.43 | FLT3           | 0.49  | -0.22 |
| P24 | DMSO                   | 78.13  | reference      | 0.09  | 0.10  |
